1 **Genomic and kinetic analysis of novel Nitrospinae enriched by cell sorting**

2

3 Anna J. Mueller<sup>1</sup>, Man-Young Jung<sup>1</sup>, Cameron R. Strachan<sup>2,3</sup>, Craig W. Herbold<sup>1</sup>, Rasmus H.

4 Kirkegaard<sup>4</sup>, Michael Wagner<sup>1,4,5</sup>, Holger Daims<sup>1,5</sup>

5

6 1. University of Vienna, Centre for Microbiology and Environmental Systems Science, Division  
7 of Microbial Ecology, Althanstrasse 14, 1090 Vienna, Austria.

8 2. Food Technology and Veterinary Public Health, Department for Farm Animals and Public  
9 Health, University of Veterinary Medicine Vienna, Veterinärplatz 1, 1210 Vienna, Austria.

10 3. FFoQSI GmbH, Technopark 1C, 3430 Tulln, Austria.

11 4. Center for Microbial Communities, Department of Chemistry and Bioscience, Aalborg  
12 University, Fredrik Bajers Vej 7H, 9220 Aalborg, Denmark.

13 5. University of Vienna, The Comammox Research Platform.

14

15 **Correspondence:** Holger Daims, Centre for Microbiology and Environmental Systems Science,  
16 Division of Microbial Ecology, University of Vienna, Althanstrasse 14, 1090 Vienna, Austria. E-  
17 mail: [holger.daims@univie.ac.at](mailto:holger.daims@univie.ac.at)

18

19 **Running title:** Characterization of novel Nitrospinae

20 **Competing interests:** RHK owns part of DNASense ApS. The remaining authors declare no  
21 competing interests.

22

23

24 **Abstract**

25 Chemolithoautotrophic nitrite-oxidizing bacteria (NOB) are key players in global nitrogen and  
26 carbon cycling. Members of the phylum Nitrospinae are the most abundant, known NOB in the  
27 oceans. To date, only two closely affiliated Nitrospinae species have been isolated, which are  
28 only distantly related to the environmentally abundant uncultured Nitrospinae clades. Here, we  
29 applied live cell sorting, activity screening, and subcultivation on marine nitrite-oxidizing  
30 enrichments to obtain novel marine Nitrospinae. Two binary cultures were obtained, each  
31 containing one Nitrospinae strain and one alphaproteobacterial heterotroph. The Nitrospinae  
32 strains represent two new genera, and one strain is more closely related to environmentally  
33 abundant Nitrospinae than previously cultured NOB. With an apparent half-saturation constant  
34 of  $8.7 \pm 2.5 \mu\text{M}$ , this strain has the highest affinity for nitrite among characterized marine NOB,  
35 while the other strain ( $16.2 \pm 1.6 \mu\text{M}$ ) and *Nitrospina gracilis* ( $20.1 \pm 2.1 \mu\text{M}$ ) displayed slightly  
36 lower nitrite affinities. The new strains and *N. gracilis* share core metabolic pathways for nitrite  
37 oxidation and CO<sub>2</sub> fixation but differ remarkably in their genomic repertoires of terminal  
38 oxidases, use of organic N sources, alternative energy metabolisms, osmotic stress and phage  
39 defense. The new strains, tentatively named “*Candidatus Nitrohelix vancouverensis*” and  
40 “*Candidatus Nitronauta litoralis*”, shed light on the niche differentiation and potential ecological  
41 roles of Nitrospinae.

42

43

## 44 **Introduction**

45 Bioavailable nitrogen is essential to all life on earth and the growth limiting factor in many  
46 ecosystems. With that said, in marine habitats, an excess in nitrogen availability due to  
47 anthropogenic pollution can cause dramatic effects such as coastal eutrophication and the  
48 formation of hypoxic dead zones [1]. The majority of fixed nitrogen in marine systems is  
49 composed of nitrate ( $\text{NO}_3^-$ ) [2]. While microbially catalyzed, nitrite oxidation by  
50 chemolithoautotrophs is thought to be the most significant biological pathway in terms of nitrate  
51 production, surprisingly little is known about the underlying microbiology in the oceans. The  
52 known diversity of marine nitrite-oxidizing bacteria (NOB) consists of members of the phylum  
53 Nitrospinae and representatives of the genera *Nitrospira*, *Nitrococcus*, *Nitrobacter*, and  
54 *Nitrotoga* [3]. Among these, the Nitrospinae (recently proposed to be renamed to Nitrospinota  
55 [4]) are the most abundant NOB in the majority of the marine environments studied so far. They  
56 have been found to be present in a wide range of habitats including the free water column,  
57 oxygen minimum zones (OMZs), sediments, and deep-sea trenches [5-17]. Interestingly, nitrite  
58 oxidoreductase (NXR), the key enzyme for nitrite oxidation, was found to be highly abundant in  
59 metaproteomic studies of OMZs [11, 12] and high *in situ* nitrite oxidation rates were measured,  
60 although nitrite oxidation is considered to be an aerobic process and OMZs are strongly oxygen  
61 limited [5, 18, 19]. In addition to their importance in the nitrogen cycle, the Nitrospinae have  
62 been suggested to play a major role in dark ocean carbon fixation by contributing up to 15-45%  
63 of the fixed inorganic carbon in some environments [20]. The contribution of Nitrospinae to  $\text{CO}_2$   
64 fixation is, however, still under debate [21, 22], partially due to a lack of cultured representative  
65 organisms.

66 To date, only two strains from the Nitrospinae have been isolated, both of which are members of  
67 the genus *Nitrospina* (*N. gracilis* and *N. watsonii*) and are closely related to each other (97.9%  
68 16S rRNA identity) [23, 24]. Experimental and genomic evidence obtained thus far from these  
69 two cultured strains points to *Nitrospina* spp. being chemolithoautotrophic NOB and obligate  
70 aerobes [23–25]. However, single-cell genomic analyses of marine bacteria have revealed a  
71 much higher diversity of Nitrospinae. Accordingly, the phylum contains at least two additional  
72 major phylogenetic lineages, which are only distantly affiliated with the genus *Nitrospina* and  
73 are referred to as “Clade 1” (“*Candidatus* (*Ca.*) Nitromaritima”) and “Clade 2” [6, 20].  
74 Intriguingly, these uncultured organisms are considerably more abundant in the environment  
75 than *Nitrospina* spp. [20]. They were predicted to be NOB based on the presence of *nxr* genes,  
76 but direct physiological evidence of this activity has been lacking. Various other NOB, such as  
77 *Nitrospira* members, have been shown to be able to utilize alternative energy metabolisms,  
78 including the oxidation of hydrogen or formate coupled to oxygen or nitrate reduction [26–28].  
79 There is also some genomic and metagenomic evidence for putative alternative metabolisms in  
80 the Nitrospinae, such as hydrogen oxidation, sulfite oxidation, and nitrate reduction, which  
81 remain to be tested [6, 7, 20, 25]. Indeed, ecophysiological analyses of Nitrospinae outside the  
82 described genus *Nitrospina* are hampered by the lack of any cultivated strains that could  
83 systematically be characterized. The major cause of this deficiency is the recalcitrance of most  
84 NOB to cultivation and the time needed to isolate these organisms by traditional approaches [24,  
85 29], which can take more than a decade.

86 We therefore employed an accelerated approach based on live cell sorting and obtained two  
87 binary co-cultures, each containing a novel Nitrospinae genus and a heterotrophic bacterium.  
88 Excitingly, one of the strains groups with the environmentally abundant but uncultured

89 Nitrospinae clades 1 and 2 [20]. Here, we describe both strains, including genomic  
90 characterization and determination of their nitrite affinities, in order to expand our understanding  
91 of the diversity and ecophysiology of the Nitrospinae and provide new model organisms from  
92 this globally important phylum.

93

## 94 **Materials and Methods**

### 95 **Sample collection, pre-enrichment and cultivation of NOB**

96 Sandy coastal surface sediment (0-3cm) samples were taken at Burrard Inlet, Vancouver, Canada  
97 (49°16'22.1"N 123°11'32.5"W) in November 2016 and in Elba, Italy (42°43'48.1"N  
98 10°09'23.2"E) in November 2016. Aliquots of the sediments were inoculated into 50 ml Schott  
99 glass bottles filled with 25 ml marine minimal medium at pH 7.4-7.6 containing 4.2  $\mu\text{l l}^{-1}$   
100 supplement solution (0.02g  $\text{l}^{-1}$  biotin, 0.02g  $\text{l}^{-1}$  folic acid, 0.10g  $\text{l}^{-1}$  pyridoxine HCL, 0.05g  $\text{l}^{-1}$   
101 riboflavin, 0.05g  $\text{l}^{-1}$  nicotinic acid, 0.05g  $\text{l}^{-1}$  DL-pantothenic acid, 0.05g  $\text{l}^{-1}$  P-aminobenzoic acid,  
102 2.00g  $\text{l}^{-1}$  choline chloride and 0.01g  $\text{l}^{-1}$  vitamin B<sub>12</sub>) and 0.5 mM NO<sub>2</sub><sup>-</sup>, and incubated at 28°C in  
103 the dark without agitation [30]. The marine minimal medium was modified from the medium  
104 used for the cultivation of *N. gracilis* and *N. watsonii* by replacing natural seawater with 33.4 g  $\text{l}^{-1}$   
105 <sup>1</sup> (Vancouver) and 39.9 g  $\text{l}^{-1}$  (Elba) red sea salts (Red Sea Aquaristic) dissolved in Milli-Q water  
106 [23–25]. A higher salinity was chosen for the Elba enrichment to reflect the higher salt  
107 concentrations in the Mediterranean Sea. The enrichments were regularly checked for nitrite  
108 consumption and nitrate formation by using nitrite/nitrate test stripes (Merckoquant, Merck).  
109 Upon consumption of nitrite, the cultures were replenished with 0.5 to 1 mM nitrite (Vancouver  
110 Nitrospinae) or up to 5 mM nitrite (Elba Nitrospinae and *N. gracilis*) (final concentrations). Once  
111 nitrite oxidation was consistently observed, aliquots of the cultures were transferred at a 1:10

112 ratio into fresh media. Unless stated otherwise, the Vancouver and Elba Nitrospinae were  
113 cultured as described above. *N. gracilis* was grown at the same red sea salt concentration as the  
114 Vancouver Nitrospinae. Growth of the Nitrospinae strains on solid media was tested on Marine  
115 Broth 2216 (Difco, BD) and the strain specific marine minimal media that were solidified with  
116 15g l<sup>-1</sup> agar.

117

### 118 **Cell sorting and activity screening**

119 Cells were concentrated from 10 ml of the enrichment cultures by centrifugation (4500×g, 20  
120 min, 28°C) using a swing-bucket rotor (Eppendorf) and resuspended in approximately 200 µl of  
121 the supernatant. Subsequently, the cells were sorted into sterile 96-well tissue culture plates  
122 (VWR, item no. 10062-900) by using the single cell sorting option at a pressure of 60 psi on a  
123 MoFlo Astrios Flow Cytometer (Beckman Coulter) equipped with a 70 µm jet in air nozzle. On  
124 the instrument, cells were visualized in the forward and side scatter channel and small, non-cell  
125 particles were excluded; otherwise no gating was applied. The wells of the microtiter plates  
126 contained 200 µl of sterile mineral salt medium amended with supplements (see cultivation  
127 details above) and 0.25 mM sodium nitrite. For the cultivation of the Vancouver sourced  
128 Nitrospinae strain, the sorting medium additionally contained 0.1 mM sodium pyruvate to  
129 alleviate oxidative stress [31]. The 96-well microtiter plates were placed in closed plastic bags to  
130 prevent evaporation, incubated at 28°C in the dark without agitation and 10 µl aliquots of each  
131 well were regularly checked for nitrite consumption with the Griess assay [32]. Selected wells,  
132 which showed nitrite consumption, were gradually scaled up by transferring the cultures into  
133 larger volume microtiter plates and doubling the culture volume after each round of nitrite  
134 consumption up to 3.2 ml and then to a final volume of 25 or 50 ml in Schott bottles. The

135 cultures were further cultivated as described for the enrichments (see above). Once sufficient  
136 biomass was available, the enriched nitrite-oxidizing organisms were provisionally identified by  
137 full-length 16S rRNA gene amplification and Sanger sequencing.

138 The morphology of the cells was visualized via scanning electron microscopy and catalyzed  
139 reporter deposition fluorescence *in situ* hybridization (CARD-FISH) with the Nitrospinae  
140 specific 16S rRNA-targeted probe Ntspn759 [21] (Supplemental Materials and Methods).

141

## 142 **Genomic and phylogenetic analyses**

143 DNA was extracted from the cultures and complete genomes were obtained through Illumina and  
144 Nanopore sequence co-assemblies. A 16S rRNA gene phylogenetic tree was calculated and the  
145 genomes were annotated on the MicroScope platform (MAGE Workflow version: 1.8 [33])  
146 (Supplemental Materials and Methods).

147 Publicly available Nitrospinae genomes, including metagenome assembled genomes (MAGs)  
148 and single-cell amplified genomes (SAGs), were retrieved from NCBI and from the JGI genome  
149 portal (see Table S1 for details). Completeness and contamination of the genomes was assessed  
150 by CheckM (v. 1.0.18) (Table S1), and phylogenetic analyses were conducted on genomes that  
151 were more than 80% complete and less than 10% contaminated [34]. A phylogenetic tree was  
152 calculated with an alignment of concatenated conserved bacterial marker proteins, made with the  
153 GTDB (Genome Taxonomy Database) toolkit (v. 0.3.2), using IQ-TREE (v. 1.6.11, model:  
154 LG+F+R5 as chosen by automatic model selection and 1000 ultrafast bootstrap runs) [4, 35–37].  
155 The genomes of *Nitrospira moscoviensis*, *G. metallireducens*, and *D. multivorans* served as  
156 outgroup. Clades within the Nitrospinae were depicted as they have been previously described in  
157 the literature [6, 20]. Average amino acid identity (AAI) and whole-genome nucleotide identity

158 (gANI) were calculated as described elsewhere [38–40] and visualized using R (v. 3.6.1) with the  
159 R package tidyverse (v. 1.3.0) [41]. The GTDB-TK output (Table S1) was used to delineate  
160 phylogenetic affiliations beyond the genus level [4].

161 The raw reads and genomes of the novel Nitrospinae strains were submitted to NCBI under the  
162 Bioproject accession PRJNA602816 and the Biosamples SAMN13976148 (“*Ca. Nitrohelix*  
163 *vancouverensis*” VA) and SAMN13976151 (“*Ca. Nitronauta litoralis*” EB). The genomes are  
164 further available on the MicroScope platform under the accession NTSPN23.2 (“*Ca. Nitrohelix*  
165 *vancouverensis*” VA) and NTSPN 3.2 (“*Ca. Nitronauta litoralis*” EB).

166

### 167 **Nitrite oxidation kinetics**

168 Nitrite oxidation kinetics of the Nitrospinae co-cultures and *N. gracilis* were quantified by  
169 measuring nitrite-dependent oxygen consumption in a microrespirometry (MR) system  
170 (Unisense) as described in detail by Kits *et al.* [42]. To concentrate the biomass for MR, cells  
171 were collected from 100 to 300 ml of culture with Amicon Ultra-15 tubes (Millipore) by  
172 centrifugation (4500×g, 10 min, 28°C) using a swing-bucket rotor (Eppendorf). Concentrated  
173 biomass was washed and resuspended in nitrite free growth medium for the MR experiments.  
174 The media did not contain supplements to prevent oxygen respiration due to the degradation of  
175 organic compounds by the co-enriched, heterotrophic bacteria during the MR experiment.  
176 Culture biomass was incubated in a water bath set to the experimental temperature prior to being  
177 transferred to a 2 ml glass MR chamber with a stir bar. All MR experiments were performed with  
178 300 rpm stirring at 28°C. Small culture volumes (~10 µl) were taken before and immediately  
179 after nitrite injection, and ~5 min after nitrite depletion for nitrite/nitrate measurements to  
180 confirm stoichiometric conversion of oxygen, nitrite and nitrate. Protein concentrations were



181 determined with the Pierce BCA protein assay (ThermoScientific) and cell abundances by qPCR  
182 (Supplementary Methods). All experiments were replicated three times or more, using at least  
183 two different cultures on different days (see Results and Discussion for total biological and  
184 technical replicates per strain). For one replicate of each strain, images of the cells stained with  
185 DAPI were taken before and after the MR measurements by using an epifluorescence  
186 microscope (Zeiss). These images were used to check whether the cells in the MR chamber had  
187 formed aggregates, which could cause oxygen diffusion limitations and thus affect the measured  
188 respiration rates and the inferred nitrite oxidation kinetics. No aggregates were observed.

189

## 190 **Results and Discussion**

### 191 **Cultivation of novel Nitrospinae representatives**

192 For the initial enrichment of marine NOB, nitrite-containing mineral media were inoculated with  
193 coastal surface sediment samples taken in Vancouver, Canada, and on Elba, Italy. Within 4  
194 weeks of incubation, nitrite oxidation to nitrate was detected in the cultures and this activity  
195 continued to be observed after subsequent replenishment of nitrite and transfers of culture  
196 aliquots into fresh medium. Usually, the further purification of NOB from accompanying  
197 organisms in the enrichment cultures is hindered by the very slow growth and inability of most  
198 NOB (including all cultured Nitrospinae) to grow on solid media. To expedite the purification of  
199 Nitrospinae strains from our initial enrichments, which was previously a laborious and lengthy  
200 process [24], we developed a method for the physical separation, activity-based identification of  
201 NOB, and subcultivation in 96-well microtiter plates. This method uses random, non-fluorescent,  
202 single-cell sorting using a fluorescence activated single cell sorting (FACS) instrument paired  
203 with a nitrite consumption activity screen (Fig. S1a). Thus it differs from a previously reported

204 FACS isolation approach for *Nitrospira* NOB from activated sludge, where the NOB were  
205 targeted based on their known cell cluster size and shape, which had been determined by  
206 *Nitrospira*-specific rRNA-targeted FISH analysis before FACS was performed [43]. Our method  
207 does not rely on prior knowledge of the identity and morphology of the NOB [43], but is solely  
208 based on the detection of nitrite oxidation after sorting. Still, it might allow for a flexible  
209 selection of the sorted cell morphologies by adjusting the gating parameters. While the previous  
210 method facilitated the isolation of already known NOB, the approach used in our study was  
211 designed for the discovery of novel nitrite oxidizers that grow under the given conditions. It may  
212 also be suitable for the isolation of other microorganisms that can be efficiently sorted (i.e., grow  
213 in suspension or that can be suspended by sonication or other methods) and that perform a  
214 specific metabolism of interest, which is detectable by a colorimetric, fluorimetric, or other high-  
215 throughput assay. Examples include previously performed, high-throughput enzyme discoveries  
216 and the isolation of microalgae [44–46]. After sorting cells from the initial Vancouver and Elba  
217 enrichment cultures into one 96-well plate each, several wells showed nitrite-oxidizing activity  
218 within 3-4 weeks. Cells from three active wells from the Elba enrichment and 4 for the  
219 Vancouver enrichment (>4 were active) were progressively transferred into larger culture  
220 volumes. This procedure led to the separate enrichment of two different Nitrospinae, one from  
221 each of the initial enrichments, that were identified by 16S rRNA gene sequencing (Fig. S1b):  
222 strain VA (Vancouver) and strain EB (Elba). Interestingly, despite attempted single-cell sorting  
223 and various dilution to extinction attempts, an axenic culture could not be established for either  
224 of the two obtained Nitrospinae strains. Rather, these cultures represent binary co-cultures each  
225 containing one Nitrospinae strain, one alphaproteobacterial strain, and no other detectable

226 microorganisms. Overall, using this single-cell sorting and screening method, we were able to  
227 obtain the two binary co-cultures from the environmental samples in approximately 10 months.

228

### 229 **Co-enrichment with Alphaproteobacteria**

230 Pure cultures of the two co-enriched heterotrophic strains were obtained on Marine Broth Agar.

231 Subsequent 16S rRNA gene analysis of these isolates showed that the two Nitrospinae strains

232 had been co-cultured with members of two distinct genera within the Alphaproteobacteria. Strain

233 VA was co-cultured with a bacterium most closely related to *Stappia stellulata* strain

234 (NR\_113809.1, 99.58% 16S rRNA gene sequence identity), whereas the EB strain culture

235 contained a *Maritimibacter alkaliphilus* strain (NR\_044015.1, 100% 16S rRNA gene sequence

236 identity). Both these species have previously been isolated from marine environments and have

237 been described as alkaliphilic chemoorganoheterotrophs that can use a wide variety of simple

238 and complex organic substrates [47, 48]. In our cultures, which were only provided with nitrite

239 for growth, the alphaproteobacterial strains may have lived off simple organic compounds that

240 were excreted by the autotrophic Nitrospinae. Since the NOB could not be grown separately

241 from the heterotrophs, it is tempting to speculate that the Nitrospinae strains also benefitted, for

242 example, from reactive oxygen species (ROS) protection by the heterotrophs. Superoxide

243 dismutase and catalase genes are present in the genomes of both co-cultured alphaproteobacteria,

244 and other isolates of both species are catalase positive [47, 48]. Similar interactions have already

245 been observed in marine autotroph-heterotroph co-cultures, including other nitrifiers [49–51].

246

## 247 **Phylogeny of the novel Nitrospinae**

248 Closed genomes were reconstructed for both Nitrospinae strains by co-assembling Illumina and  
249 Nanopore sequencing data. Since the genome of *N. gracilis* was nearly completely sequenced but  
250 not closed [25] (Table S2), the obtained genomes represent the first closed genomes from  
251 Nitrospinae. With a length of >3.9 Mbp, Nitrospinae strain EB has a larger genome than the  
252 other cultured Nitrospinae strains sequenced to date (Table S2).

253 Phylogenetic analysis of the 16S rRNA genes (Fig. S1b) showed that the Nitrospinae strains VA  
254 and EB are only distantly related to *N. gracilis* (93% sequence identity with EB and 91% with  
255 VA), *N. watsonii* (92% sequence identity with EB and 90% with VA), and to each other (90%  
256 sequence identity). Since public databases contained only few 16S rRNA gene sequences closely  
257 related to strains VA and EB (Fig. S1b), these strains seem to represent a yet underexplored  
258 diversity of Nitrospinae. A phylogenetic tree using conserved concatenated marker proteins from  
259 all available Nitrospinae genomes that are >80% complete and <10% contaminated, including  
260 MAGs and SAGs, further confirmed that the strains obtained here represent novel lineages  
261 (Fig. 1). In particular, strain VA was more closely related with the Clade 1 and 2 Nitrospinae  
262 than *N. gracilis*, although it was clearly not a member of either group. In the concatenated  
263 marker tree, it belonged to a third well-resolved clade with additional MAGs. The exact  
264 branching order between Clade 1, 2, and this third clade remained unresolved (Fig. 1, Fig. S1b).

265 The novelty of the two cultured Nitrospinae strains was corroborated by genome average  
266 nucleotide identity (gANI) (Fig. S2) and average amino acid identity (AAI) (Fig. 2) analyses.  
267 Since strain VA, strain EB, and most of the Nitrospinae members in the dataset are quite  
268 distantly related (below the 96.5% species level cut-off [39]), gANI (Fig. S2) was not suitable to  
269 further resolve their taxonomic grouping. However, AAI analysis revealed a high genus-level

270 diversity within the Nitrospinae, comprising 15 distinct genera according to a proposed 60%  
271 genus level cut-off [52]. Both strains from this study, VA and EB, represent a new genus with  
272 55% and 58% AAI to *N. gracilis*, respectively, and 53% AAI to each other (Fig. 2). The AAI  
273 analysis also suggested that each of the environmental clades 1 (“*Ca. Nitromaritima*”) and 2  
274 represent separate genera, with the lowest AAI values within each clade being >70%, and that  
275 these genera are distinct from the genus containing strain VA (Fig. 2). In order to make  
276 taxonomic inferences beyond the genus level, the GTDB-TK tool [38] was applied to the  
277 Nitrospinae genome dataset. GTDB-TK confirmed that strains VA and EB belonged to the  
278 Nitrospinaceae family but, in agreement with the AAI analysis, did not assign them to a genus  
279 (Tab. S2). While we showed that nitrite oxidation is spread among phylogenetically distant  
280 members within the Nitrospinaceae, no nitrite oxidation phenotype has been observed yet for the  
281 Nitrospinae members that do not belong to the Nitrospinaceae family.

282 Taken together, the phylogenetic, ANI, AAI, and GTDB-TK analyses revealed a high genus-  
283 level diversity within the Nitrospinae, the vast majority remaining uncultured and poorly  
284 characterized. Among all cultured Nitrospinae members, strain VA is most closely related with  
285 the uncultured but environmentally abundant clades 1 and 2 [6, 7, 20, 21].

286

### 287 **Cell morphology**

288 The morphologies of the new Nitrospinae strains were visualized using scanning electron  
289 microscopy (SEM), and by 16S rRNA-targeted CARD-FISH using a Nitrospinae-specific  
290 oligonucleotide probe (Ntspn759) [21]. Strain VA cells were helically shaped rods (Fig. 3a, d, g),  
291 whereas strain EB appeared to be short, slightly curved rods (Fig. 3b, e, h). Interestingly, neither  
292 of the two strains displayed the long, slender, rod-shaped morphology that was mostly observed

293 for the previously isolated *Nitrospina* species, *N. gracilis* (Fig. 3c, f, i) [23]. The shape of strain  
294 VA (Fig. 3a, d, g) rather resembled *Nitrospira* species [53]. The short, slightly curved rod  
295 morphology of strain EB (Fig. 3b, e, h) resembled the compact cell shape reported for aging  
296 cultures of *N. watsonii* [24] and environmental Nitrospinae [5]. While the helical shape of strain  
297 VA could be clearly distinguished from the co-cultured *Stappia* sp. using Nitrospinae-specific  
298 FISH (Fig. 3g) and SEM of the *Stappia*-like isolate (Fig. S3), assigning a morphology to strain  
299 EB was slightly more difficult due a more similar morphotype of the co-cultured *Maritimibacter*-  
300 like bacterium (Fig. 3e and Fig. S3b). According to SEM, the isolated *Maritimibacter* had a  
301 coccoid morphology (Fig. S3) similar to the slightly smaller coccoid cells that were observed in  
302 the active co-culture with strain EB (Fig. 3e). Therefore, we assume that the slightly larger,  
303 curved rods in the SEM pictures (Fig. 3b, e) were Nitrospinae strain EB cells. However, the  
304 previously described morphological variability suggests that the cell shape of Nitrospinae is  
305 influenced by the growth stage and environment [23, 24]. Thus, morphology would be of limited  
306 use as the sole criterion to differentiate Nitrospinae strains from each other and from other  
307 organisms. We propose the name “*Candidatus Nitrohelix vancouverensis*” VA for strain VA based  
308 on its observed morphology and isolation source, and “*Candidatus Nitronauta litoralis*” EB for strain  
309 EB based on its isolation source.

310

### 311 **Nitrite oxidation: activity and kinetics**

312 Both Nitrospinae strains oxidized nitrite stoichiometrically to nitrate (Fig. S4). Exponential  
313 growth of “*Ca. N. vancouverensis*” correlated with the consumption of nitrite (Fig. S4a),  
314 whereas “*Ca. N. litoralis*” did not enter the exponential growth phase during the incubation  
315 period (Fig. S4b). During the experiment, the relative abundance of “*Ca. N. vancouverensis*”  
316 compared to the co-cultured *Stappia* sp. increased pronouncedly from 6 to 75% (Fig. S4a). The

317 relative abundance of “*Ca. N. litoralis*” compared to the *Maritimibacter sp.* could not be reliably  
318 determined during the incubation experiment (Fig. S4b), but measurements taken after the MR  
319 experiments (see below) showed that the relative abundance of “*Ca. N. litoralis*” ranged from  
320 approximately 56 to 99%. Thus, the quantitative composition of each co-culture appeared to  
321 fluctuate and likely depended strongly on the availability of nitrite as the substrate for the NOB  
322 strains.

323 The kinetics of nitrite oxidation of *N. gracilis* and the two novel Nitrospinae strains were  
324 assessed by measuring the nitrite-dependent oxygen consumption in MR experiments. For all  
325 three NOB, nitrite oxidation followed Michaelis-Menten kinetics (Fig. S5). The stoichiometry of  
326  $\text{NO}_2^-$  and  $\text{O}_2$  consumption was always close to 1:0.5 (*N. gracilis*: mean=1:0.49; s.d.=0.02;  $n=8$ ;  
327 “*Ca. N. vancouverensis*”: mean=1:0.51; s.d.=0.01;  $n=4$ ; “*Ca. N. litoralis*”: mean=1:0.51;  
328 s.d.=0.02;  $n=5$ ). This ratio was expected for NOB [54] and indicates that  $\text{O}_2$  consumption by the  
329 co-enriched heterotrophs was only minor during the relatively short MR experiments (maximum  
330 1 h) and did not affect the kinetic analysis of “*Ca. N. vancouverensis*” and “*Ca. N. litoralis*”. The  
331 apparent half-saturation constant,  $K_{m(\text{app})}$ , of *N. gracilis* was determined to be 20.1  $\mu\text{M NO}_2^-$   
332 (s.d.=2.1,  $n=8$ ) and the maximum reaction rate,  $V_{max}$ , to be 41.4  $\mu\text{mol NO}_2^- \text{mg protein}^{-1} \text{hour}^{-1}$   
333 (s.d.=9.4,  $n=6$ ), which is highly similar to the previously reported  $K_{m(\text{app})}$  and  $V_{max}$  of the closely  
334 related *N. watsonii* (18.7±2.1  $\mu\text{M NO}_2^-$  and 36.8  $\mu\text{mol NO}_2^- \text{mg protein}^{-1} \text{hour}^{-1}$ ) [55]. The  $K_{m(\text{app})}$   
335 measured for “*Ca. N. litoralis*” was 16.2  $\mu\text{M NO}_2^-$  (s.d.=1.6,  $n=7$ ) and thus resembled the values  
336 of *N. gracilis* and *N. watsonii*. In contrast, with a  $K_{m(\text{app})}$  of 8.7  $\mu\text{M NO}_2^-$  (s.d.=2.5,  $n=3$ ), “*Ca. N.*  
337 *vancouverensis*” showed a higher affinity for nitrite that was comparable with non-marine  
338 *Nitrospira* members ( $K_{m(\text{app})}=6$  to 9  $\mu\text{M NO}_2^-$ ), which have been the cultured NOB with the  
339 highest nitrite affinity known so far [54, 56]. Indeed, strain VA turned out to have the lowest

340  $K_{m(\text{app})}$  of all hitherto analyzed marine NOB in culture (Fig. 4). Interestingly, among all cultured  
341 marine NOB, “*Ca. N. vancouverensis*” is also most closely related to the Nitrospinae clades 1  
342 and 2 that are abundant in oligotrophic waters [20] (see above). However, its  $K_{m(\text{app})}$  is still 1-2  
343 orders of magnitude higher than the  $K_{m(\text{app})}$  values of nitrite oxidation reported for environmental  
344 samples from an OMZ ( $0.254 \pm 0.161 \mu\text{M NO}_2^-$ ) and South China Sea waters (0.03 to 0.5  $\mu\text{M}$ )  
345 [22, 57]. The very high nitrite affinity observed with these samples might be explained by the  
346 presence of uncharacterized nitrite oxidizers, whose nitrite affinity exceeds that of all cultured  
347 NOB. However, it remains to be tested whether known NOB can persist under extremely low *in*  
348 *situ* nitrite concentrations. For example, the half-saturation constant of growth for ammonia  
349 oxidizing bacteria spans several orders of magnitude under different temperatures [58]. Strongly  
350 different substrate affinities have also been observed for *Nitrobacter winogradskyi* and  
351 *Escherichia coli* under oligotrophic versus copiotrophic growth conditions [59, 60]. Systematic  
352 assessments of the kinetic plasticity of NOB under different conditions are still pending, mainly  
353 because the production of sufficient biomass of NOB isolates has been a major obstacle for such  
354 studies.

355

### 356 **General genomic features of cultured Nitrospinae**

357 A pan-genomic analysis of the two novel cultured Nitrospinae strains and *N. gracilis* showed that  
358 these three organisms share a core genome of 1347 proteins, which have at least 50% amino acid  
359 sequence identity over 80% of the alignment (Fig. S6). The core genome included universally  
360 highly conserved bacterial genes, such as those coding for ribosomal proteins, translational  
361 elongation factors and the DNA replication machinery, as well as the genes for the core  
362 metabolism of chemolithoautotrophic NOB. Interestingly, among the shared conserved genes we



363 also found highly conserved glutaredoxins, thioredoxin reductases, and peroxidases (>80%  
364 amino acid identity among the respective homologs). Like *N. gracilis* [25], “*Ca. N.*  
365 *vancouverensis*” and “*Ca. N. litoralis*” lack the canonical defense systems of aerobic organisms  
366 against oxidative stress, catalase and superoxide dismutase. While the aforementioned core genes  
367 could thus be essential for the detoxification of peroxides in all three organisms [61, 62], it  
368 remains a mystery how Nitrospinae deal with superoxide radicals [25]. Each of the strains  
369 encode a number of unique proteins (Fig. S6), many of which are phage related, corroborating a  
370 recently proposed hypothesis predicting extensive phage predation on Nitrospinae [21]  
371 (Supplemental Results and Discussion, Fig. S8). Yet, the majority of the variable genome  
372 content is still functionally uncharacterized. However, a few genes of the variable genome have  
373 known functions and might be important for niche adaptations. In the following sections, we  
374 address these genes as well as the shared core metabolism of the three analyzed Nitrospinae.

375

### 376 **Nitrite oxidation and respiration**

377 Among the highly conserved proteins are the three known subunits of a periplasmic nitrite  
378 oxidoreductase, NxrABC. Details of the predicted subunit composition and cofactors of the NXR  
379 of Nitrospinae, which is closely related to the NXR of *Nitrospira*, have been described elsewhere  
380 [3, 25, 63]. Briefly, all three Nitrospinae strains possess two genomic copies of the substrate-  
381 binding subunit NxrA, two or three (only “*Ca. N. vancouverensis*”) copies of the electron-  
382 channeling subunit NxrB (Fig. S7), and several copies of putative NxrC subunits, which may  
383 transfer electrons from NXR to a downstream acceptor in the electron transport chain (Table S4).  
384 Homologs to all of the different putative NxrC subunits of *N. gracilis* [25] were also found in

385 “*Ca. N. vancouverensis*” and “*Ca. N. litoralis*” (Table S4), but it remains to be determined  
386 whether all of these proteins are functionally involved in nitrite oxidation.

387 The respiratory electron transport chain of NOB is short, as electrons derived from nitrite are  
388 directly transferred, via *a*- or *c*-type cytochromes, to the terminal oxidase (complex IV) [25, 63,  
389 64]. *N. gracilis* carries a *cbb*<sub>3</sub>-type high affinity heme-copper cyt. *c* oxidase (HCO) [25], whereas  
390 both “*Ca. N. vancouverensis*” and “*Ca. N. litoralis*” lack any canonical HCO. However, all three  
391 organisms encode highly conserved, putative “*bd*-like oxidases” [25]. These proteins, which also  
392 occur in all *Nitrospira* genomes, are phylogenetically related with but clearly distinct from the  
393 canonical cyt. *bd*-type quinol oxidases [63]. Interestingly, one variant of the *bd*-like oxidases  
394 from *Nitrospira* contains all conserved amino acid residues for heme and Cu binding in HCOs  
395 [65], indicating that this enzyme could be a novel cyt. *c*-oxidizing HCO [63]. The *bd*-like  
396 oxidases of *N. gracilis*, “*Ca. N. vancouverensis*”, and “*Ca. N. litoralis*” have most of these  
397 conserved residues; however, one of the three histidine ligands of the Cu<sub>B</sub> is replaced with a  
398 glutamine, and the histidine ligand of the high-spin heme is replaced with a phenylalanine. Thus,  
399 without the *cbb*<sub>3</sub>-type oxidase found only in *N. gracilis*, it remains unclear how the final electron  
400 transport step from cyt. *c* to O<sub>2</sub> occurs in “*Ca. N. vancouverensis*” and “*Ca. N. litoralis*”. Future  
401 biochemical and protein structural research may reveal whether the cyt. *bd*-like oxidases can  
402 catalyze this reaction despite their divergence from *bona fide* HCOs at two of the predicted  
403 cofactor-binding residues, and whether these proteins are capable of proton translocation for  
404 proton motive force generation. Corroborating evidence for a function of this enzyme in the  
405 context of electron transport stems from its highly conserved genetic synteny within Nitrospinae,  
406 Nitrospirae and anammox bacterial genomes. A conserved cluster within these organisms  
407 contains a cyt. *bd*-like oxidase with the aforementioned glutamine and phenylalanine residues, a

408 diheme- and a triheme- cyt. *c*, and a membrane integral, alternative NxrC subunit (Tab. S4). This  
409 putative NxrC might be involved in the electron transfer from NO<sub>2</sub><sup>-</sup> to the terminal oxidase [25,  
410 63, 66].

411 In addition to the putative cyt. *bd*-like oxidase discussed above, “*Ca. N. litoralis*” possesses a  
412 canonical cyt. *bd*-type (quinol) oxidase that is lacking in “*Ca. N. vancouverensis*” and *N.*  
413 *gracilis*. Since quinol oxidases cannot accept electrons from the high-potential donor nitrite, we  
414 assume that this oxidase receives electrons from quinol during the degradation of intracellular  
415 glycogen or during hydrogen oxidation (see below). The cyt. *bd*-type oxidase may also be  
416 involved in oxidative stress defense, as homologous oxidases in other organisms can degrade  
417 H<sub>2</sub>O<sub>2</sub> [67] and protect from dioxygen [68]. Taken together, the diverse repertoire of terminal  
418 oxidases may be a key feature of Nitrospinae that contributes to the ecological success of this  
419 lineage over a broad range of redox conditions in marine ecosystems.

420

#### 421 **Carbon metabolism and alternative energy metabolisms**

422 Like *N. gracilis* and other Nitrospinae [6, 25], the novel strains encode all key genes of the  
423 reductive tricarboxylic acid (rTCA) cycle for CO<sub>2</sub> fixation, including the hallmark enzymes  
424 ATP-citrate lyase (ACL), pyruvate:ferredoxin oxidoreductase (POR), and 2-  
425 oxoglutarate:ferredoxin oxidoreductase (OGOR). As in *N. gracilis*, all genes required for the  
426 oxidative (oTCA) cycle are also present. All three strains can form glycogen as storage  
427 compound, which is degraded via glycolysis and the oTCA cycle. Since *N. gracilis* lacks  
428 pyruvate kinase, the final step of glycolysis may be catalyzed by pyruvate phosphate dikinase  
429 (PPDK) in this organism. In contrast, strains VA and EB possess both pyruvate kinase and  
430 PPDK, indicating a strict regulatory separation between glycolysis and gluconeogenesis.

431 Alternative energy metabolisms such as the oxidation of hydrogen, sulfide or organic carbon  
432 compounds have been demonstrated in NOB with representatives from the genera *Nitrospira*,  
433 *Nitrococcus*, *Nitrolancea*, and *Nitrobacter* [3, 26–28, 69]. Among the three Nitrospinae strains  
434 analyzed here, *N. gracilis* has the largest potential to exploit energy sources other than nitrite: its  
435 genome harbors a bidirectional type 3b [NiFe] hydrogenase, which could enable aerobic  
436 hydrogen utilization, and a sulfite:cyt. *c* oxidoreductase [25]. In addition, *N. gracilis* contains the  
437 genes *prpBCD* for 2-methylisocitrate lyase, 2-methylcitrate synthase, and 2-methylcitrate  
438 dehydratase, and might thus be able to catabolically degrade propionate via the 2-methylcitrate  
439 pathway (Fig. 5). Of these potential alternative energy metabolisms, “*Ca. N. litoralis*” shares  
440 only the type 3b hydrogenase, whereas “*Ca. N. vancouverensis*” seems to be an obligate nitrite  
441 oxidizer. No genes for the uptake and utilization of urea and cyanate as organic N sources were  
442 found in the genomes of the new strains. These genes show a patchy distribution among  
443 Nitrospinae [6, 7, 20, 21, 25], suggesting further niche differentiation of these organisms based  
444 on the capacity to use organic compounds as sources of reduced N for assimilation.

445

#### 446 **Adaptations to saline environments**

447 The intracellular accumulation of ions or the production of organic osmolytes are two main  
448 strategies of microorganisms to cope with the osmotic stress in highly saline, marine  
449 environments. Interestingly, the three Nitrospinae strains seem to utilize different osmotic stress  
450 defense mechanisms. *N. gracilis* has the genetic potential to produce glycine betaine, an organic  
451 osmolyte that is ubiquitously found in bacteria (Fig. 5) [70]. It also encodes for OpuD, a  
452 betaine/carnitine/choline transporter, whereas the genes for glycine betaine synthesis and import  
453 are missing in “*Ca. N. vancouverensis*” and “*Ca. N. litoralis*”. These two strains harbor the

454 canonical genes *ectABC* for ectoine biosynthesis (Fig. 5), another widely distributed osmolyte in  
455 bacteria [70]. “*Ca. N. litoralis*” additionally encodes the ectoine hydroxylase EctD and is thus  
456 able to form hydroxyectoine. Directly downstream of the (hydroxy-)ectoine synthesis cassette,  
457 the two strains further encode an ABC transporter that has similarity to ectoine or amino acid  
458 transporters from other organisms and may be utilized for (hydroxy-)ectoine import across the  
459 cytoplasmic membrane. Since genes for the synthesis and transport of (hydroxy-)ectoine were  
460 also found in “*Ca. Nitromaritima*” (Nitrospinae clade 1) [6], we assume that usage of (hydroxy-  
461 )ectoine is wide-spread among the Nitrospinae. *N. gracilis* and “*Ca. N. litoralis*” may also be  
462 able to synthesize sucrose as an additional compatible solute (Fig. 5).

463 Moreover, “*Ca. N. vancouverensis*” and “*Ca. N. litoralis*” genomes harbor the gene *glsA* coding  
464 for a glutaminase (Fig. 5), which allows them to deaminate glutamine to glutamate while  
465 releasing ammonia. The strains further possess the *gltP* gene coding for a glutamate/H<sup>+</sup>  
466 symporter. Both *glsA* and *gltP* seem to be lacking in the *N. gracilis* genome. Since glutamate can  
467 play a role in osmoregulation [70], the ability to regulate the intracellular glutamate level via  
468 transport or the degradation of glutamine may be one of various adaptations by “*Ca. N.*  
469 *vancouverensis*” and “*Ca. N. litoralis*” to rapidly respond to stress caused by fluctuating  
470 salinities.

471 All three Nitrospinae strains have the genomic capacity to synthesize the hopanoids hopan-(22)-  
472 ol and hop-22(29)-ene (Fig. 5). Hopanoids are pentacyclic, bacterial lipids that integrate into  
473 bacterial membranes, much like cholesterol in eukaryotes [71]. They help regulate membrane  
474 fluidity and may be important in highly saline environments [70, 72]. Knock-out studies have  
475 shown that cells lacking the ability to make hopanoids are more sensitive to various stresses,  
476 such as temperature, pH and osmolarity [72]. Interestingly, a metagenomic study of hopanoid-

477 producing bacteria in the Red Sea revealed Nitrospinae to be among the main organisms  
478 harboring squalene hopene cyclase, the key gene for hopanoid production [73]. Other marine  
479 NOB (members of *Nitrospira*, *Nitrobacter* and *Nitrococcus mobilis*), and even non-marine  
480 *Nitrospira* and *Nitrobacter*, also have the squalene hopene cyclase and therefore the genomic  
481 potential to produce hopanoids. Insight into the chemical structure of the hopanoids produced by  
482 NOB could help to gain insight into early NOB evolution as hopanoids are important lipid  
483 biomarkers and commonly used to deduce ancient microbial activity from sediment fossil  
484 records [73].

485

#### 486 **Vitamin B12 auxotrophy**

487 The three Nitrospinae strains lack multiple genes involved in vitamin B12 (cobalamin) synthesis  
488 and seem to be auxotrophic for this vitamin, as previously suggested for *N. gracilis* [74]. To  
489 acquire vitamin B12 from the environment, all strains encode the vitamin B12 ABC transporter  
490 *btuCDF* and the outer membrane permease *btuB* [75][74]. Alternatively, this transporter may  
491 also import cobinamide that may then be converted to vitamin B12 via a salvage pathway that  
492 uses the genes *yvqK*, *bluB*, *cobS*, each encoded in all three Nitrospinae genomes [76]. Hence, the  
493 availability of externally supplied vitamin B12 or cobinamide is likely of crucial importance for  
494 Nitrospinae *in situ* and also in lab cultures. The incomplete cobalamin pathway in the already  
495 available *N. gracilis* genome led us to amend the cultivation medium with vitamin B12. Indeed,  
496 the addition of vitamin B12, either alone or together with other vitamins, has allowed us to  
497 cultivate *N. gracilis* in a more defined medium that is based on Red Sea salt. Previously, the  
498 standard medium for this organism had to be prepared from natural seawater [25]. Furthermore,  
499 the addition of vitamin B12 was likely an essential prerequisite for our successful enrichment of

500 novel Nitrospinae after cell sorting. The co-cultured alphaproteobacteria may also provide  
501 additional vitamin B12 as they both have the genomic repertoire for its synthesis. In the  
502 environment, vitamin B12 could be supplied by different heterotrophic or autotrophic  
503 microorganisms including ammonia-oxidizing thaumarchaeota, which have been shown to  
504 produce vitamin B12 [77–79] and often co-occur with Nitrospinae [10, 21, 80].

505

## 506 **Conclusions**

507 Nitrospinae are important players in marine nitrogen and carbon cycling, but difficulties to  
508 cultivate these bacteria have been a major obstacle for their characterization. In this study, the  
509 usually very time-consuming enrichment and purification procedure of marine NOB was  
510 accelerated by combining cell sorting with genome-informed adjustments to the cultivation  
511 medium. By employing this method, we were able to obtain two new, highly enriched  
512 Nitrospinae strains, which represent two novel genera in the Nitrospinae and double the number  
513 of available cultures from this phylum. A comparison of their completely sequenced genomes  
514 and that of *N. gracilis* revealed numerous shared metabolic features, as well as several non-  
515 shared, putative adaptations in these distantly related Nitrospinae. With the new cultures at hand,  
516 it will now be possible to systematically test such genome-based hypotheses and to elucidate the  
517 ecological roles played by members of the Nitrospinae within and beyond the nitrogen cycle.

518

## 519 **Taxonomic consideration of “*Candidatus Nitrohelix vancouverensis*” gen. nov. sp. nov.**

520 Ni.tro.he’lix L. n. nitrum: nitrate, L. n. helix: a coil, spiral; N.L. fem. n. *Nitrohelix* nitrate-  
521 forming spiral. van.cou.ver.en’sis L. fem. adj. *vancouverensis* of Vancouver.

522 A nitrate-forming helical bacterium obtained from Vancouver, Canada. Phylogenetically  
523 affiliated with the family Nitrospinae, phylum Nitrospinae. Cells are gram-negative helically  
524 shaped rods with 1-3 turns and a length of approximately 3  $\mu\text{m}$ . The genome consists of a single  
525 chromosome of 3,309,797 bp. The DNA G+C content is 51 mol%.

526 Strain “*Candidatus Nitrohelix vancouverensis* VA” was cultivated from coastal surface sediment  
527 from Vancouver, Canada. Marine aerobic chemolithoautotroph that oxidizes nitrite to nitrate.  
528  $K_{m(\text{app})}$  is  $8.7 \pm 2.5 \mu\text{M NO}_2^-$ . The strain was routinely cultured with 0.5 mM nitrite at 28°C in  
529 liquid marine mineral medium. Could not be grown on solid medium. Auxotrophic for vitamin  
530 B12 according to genome analysis.

531

532 **Taxonomic consideration of “*Candidatus Nitronauta litoralis*” gen. nov. sp. nov.**

533 Ni.tro.nau'ta L. n. nitrum: nitrate, L. n. nauta: seaman; N.L. masc. n. *Nitronauta* nitrate-forming  
534 seaman. li.to.ra'lis L. masc. adj. *litoralis* coastal.

535 A nitrate-forming marine bacterium found in a coastal habitat. Phylogenetically affiliated with  
536 the family Nitrospinae, phylum Nitrospinae. Cells are gram-negative short rods with a length  
537 of approximately 1.5  $\mu\text{m}$ . The genome consists of a single chromosome of 3,921,641 bp. The  
538 DNA G+C content is 47 mol%.

539 Strain “*Candidatus Nitronauta litoralis* EB” was cultivated from coastal surface sediment from  
540 Elba, Italy. Marine aerobic chemolithoautotroph that oxidizes nitrite to nitrate.  $K_{m(\text{app})}$  is  
541  $16.2 \pm 1.6 \mu\text{M NO}_2^-$ . The strain was routinely cultured with 1 to 5 mM nitrite at 28°C in liquid  
542 marine mineral medium. Could not be grown on solid medium. Auxotrophic for vitamin B12  
543 according to genome analysis.

544



545 **Acknowledgements**

546 We would like to thank Julia Polzin and Jillian Petersen for providing sediment samples from  
547 Elba. We are also grateful for the help from Daniela Gruber at the Core Facility of Cell Imaging  
548 and Ultrastructure Research at the University of Vienna, who supported sample preparation and  
549 visualization of electron microscopy samples. We would further like to thank Karin Kohlweiss  
550 for performing FACS and the BOKU Core Facility for *Biomolecular and Cellular Analysis* and  
551 EQ-BOKU VIBT GmbH for access to equipment. We greatly appreciate Mads Albertsen and  
552 Soeren M. Karst for the Nanopore sequencing conducted during the course “Hands-on  
553 Metagenomics using Oxford Nanopore DNA Sequencing”. We also thank Marcel Kuypers,  
554 Katharina Kitzinger, Hannah Marchant, and Bela Hausmann for valuable discussions and  
555 Bernhard Schink for advice on naming the new organisms. This study was supported by the  
556 Austrian Science fund (FWF) project Microbial Nitrogen Cycling – From Single Cells to  
557 Ecosystems (W1257). AJM was partially supported by a Fellowship from the Natural Science  
558 and Engineering Council of Canada Postgraduate Scholarship-Doctoral (NSERC PGS-D). MYJ  
559 was supported by an ERC Advanced Grant project to MW (Nitricare; 294343).

560

561 **Competing Interests**

562 RHK owns part of DNASense ApS. The remaining authors declare no competing interests.

563

564 **References**

- 565 1. Diaz RJ, Rosenberg R. Spreading Dead Zones and Consequences for Marine Ecosystems.  
566 Science. 2008; 32:926–929.
- 567 2. Ward BB. Nitrification in Marine Systems. In: Capone DG, Bronk DA, Mulholland MR,

- 568 Carpenter EJ (eds). Nitrogen in the Marine Environment. 2nd edn. (Academic Press,  
569 2008) pp 199-261.
- 570 3. Daims H, Lücker S, Wagner M. A New Perspective on Microbes Formerly Known as  
571 Nitrite-Oxidizing Bacteria. Trends Microbiol. 2016;24:699–712.
- 572 4. Parks DH, Chuvochina M, Waite DW, Rinke C, Skarszewski A, Chaumeil PA, et al. A  
573 standardized bacterial taxonomy based on genome phylogeny substantially revises the tree  
574 of life. Nat Biotechnol. 2018;36:996.
- 575 5. Füssel J, Lam P, Lavik G, Jensen MM, Holtappels M, Günter M, et al. Nitrite oxidation in  
576 the Namibian oxygen minimum zone. ISME J. 2012;6:1200–1209.
- 577 6. Ngugi DK, Blom J, Stepanauskas R, Stingl U. Diversification and niche adaptations of -  
578 *Nitrospina* like bacteria in the polyextreme interfaces of Red Sea brines. ISME J.  
579 2015;10:1–17.
- 580 7. Sun X, Kop LFM, Lau MCY, Frank J, Jayakumar A, Lücker S, et al. Uncultured  
581 *Nitrospina*-like species are major nitrite oxidizing bacteria in oxygen minimum zones.  
582 ISME J. 2019;13:2391–2402.
- 583 8. Garcia-Robledo E, Padilla CC, Aldunate M, Stewart FJ, Ulloa O, Paulmier A, et al.  
584 Cryptic oxygen cycling in anoxic marine zones. Proc Natl Acad Sci U S A.  
585 2017;114:8319–8324.
- 586 9. Levipan HA, Molina V, Fernandez C. *Nitrospina*-like bacteria are the main drivers of  
587 nitrite oxidation in the seasonal upwelling area of the Eastern South Pacific (Central Chile  
588 ~36°S). Environ Microbiol Rep. 2014;6: 565–573.
- 589 10. Mincer TJ, Church MJ, Taylor LT, Preston C, Karl DM, DeLong EF. Quantitative  
590 distribution of presumptive archaeal and bacterial nitrifiers in Monterey Bay and the North

- 591 Pacific Subtropical Gyre. *Environ Microbiol.* 2007;9:1162–1175.
- 592 11. Hawley AK, Brewer HM, Norbeck AD, Pasá-Tolić L, Hallam SJ. Metaproteomics reveals  
593 differential modes of metabolic coupling among ubiquitous oxygen minimum zone  
594 microbes. *Proc Natl Acad Sci U S A.* 2014;111:11395–11400.
- 595 12. Saito MA, McIlvin MR, Moran DM, Santoro AE, Dupont CL, Rafter PA, et al. Abundant  
596 nitrite-oxidizing metalloenzymes in the mesopelagic zone of the tropical Pacific Ocean.  
597 *Nat Geosci.* 2020;13:355–362.
- 598 13. Nunoura T, Takaki Y, Hirai M, Shimamura S, Makabe A, Koide O, et al. Hadal biosphere:  
599 Insight into the microbial ecosystem in the deepest ocean on Earth. *Proc Natl Acad Sci U*  
600 *S A.* 2015;112:E1230–E1236.
- 601 14. Rani S, Koh H, Rhee S, Fujitani H. Detection and Diversity of the Nitrite Oxidoreductase  
602 Alpha Subunit ( *nxrA* ) Gene of *Nitrospina* in Marine Sediments. *Microb Ecol.*  
603 2017;37:111–122.
- 604 15. Santoro AE, Casciotti KL, Francis CA. Activity, abundance and diversity of nitrifying  
605 archaea and bacteria in the central California Current. *Environ Microbiol.* 2010;12:1989–  
606 2006.
- 607 16. Damashek J, Tolar BB, Liu Q, Okotie-Oyekan AO, Wallsgrove NJ, Popp BN, et al.  
608 Microbial oxidation of nitrogen supplied as selected organic nitrogen compounds in the  
609 South Atlantic Bight. *Limnol Oceanogr.* 2019;64:982–995.
- 610 17. Jorgensen SL, Hannisdal B, Lanzén A, Baumberger T, Flesland K, Fonseca R, et al.  
611 Correlating microbial community profiles with geochemical data in highly stratified  
612 sediments from the Arctic Mid-Ocean Ridge. *Proc Natl Acad Sci U S A.*  
613 2012;109:E2846–E2855.

- 614 18. Bristow LA, Dalsgaard T, Tiano L, Mills DB, Bertagnolli AD, Wright JJ, et al.  
615 Ammonium and nitrite oxidation at nanomolar oxygen concentrations in oxygen minimum  
616 zone waters. *Proc Natl Acad Sci U S A.* 2016;113:10601–10606.
- 617 19. Lipschultz F, Wofsy SC, Ward BB, Codispoti LA, Friedrich G, Elkins JW. Bacterial  
618 transformations of inorganic nitrogen in the oxygen-deficient waters of the Eastern  
619 Tropical South Pacific Ocean. *Deep Sea Res Part A Oceanogr Res Pap* 1990;37:1513–  
620 1541.
- 621 20. Pachiadaki MG, Sintès E, Bergauer K, Brown JM, Record NR, Swan BK, et al. Major role  
622 of nitrite-oxidizing bacteria in dark ocean carbon fixation. *Science* 2017; 358: 1046–1051.
- 623 21. Kitzinger K, Marchant HK, Bristow LA, Herbold CW, Padilla CC, Kidane AT, et al.  
624 Single cell analyses reveal contrasting life strategies of the two main nitrifiers in the  
625 ocean. *Nat Commun.* 2020;11.
- 626 22. Zhang Y, Qin W, Hou L, Zakem EJ, Wan X, Zhao Z, et al. Nitrifier adaptation to low  
627 energy flux controls inventory of reduced nitrogen in the dark ocean. *Proc Natl Acad Sci*  
628 *U S A.* 2020;117:4823–4830.
- 629 23. Watson SW, Waterbury JB. Characteristics of Two Marine Nitrite Oxidizing Bacteria ,  
630 *Nitrospina gracilis nov. ten. nov. sp.* and *Nitrococcus mobilis nov. ten. nov. sp.\**. *Arch*  
631 *Mikrobiol.* 1971;77:203–230.
- 632 24. Spieck E, Keuter S, Wenzel T, Bock E, Ludwig W. Characterization of a new marine  
633 nitrite oxidizing bacterium , *Nitrospina watsonii sp . nov .* , a member of the newly  
634 proposed phylum “ *Nitrospinae* ”. *Syst Appl Microbiol.* 2014;37:170–176.
- 635 25. Lückner S, Nowka B, Rattei T, Spieck E, Daims H. The genome of *Nitrospina gracilis*  
636 illuminates the metabolism and evolution of the major marine nitrite oxidizer. *Front*

- 637 Microbiol Microbiol. 2013;4:1–19.
- 638 26. Koch H, Galushko A, Albertsen M, Schintlmeister A, Gruber-Doringer C, Lücker S, et al.  
639 Growth of nitrite-oxidizing bacteria by aerobic hydrogen oxidation. *Science*.  
640 2014;345:1052–1054.
- 641 27. Koch H, Lücker S, Albertsen M, Kitzinger K, Herbold C, Spieck E. Expanded metabolic  
642 versatility of ubiquitous nitrite-oxidizing bacteria from the genus *Nitrospira*. *Proc Natl*  
643 *Acad Sci U S A*. 2015;112:11371–11376.
- 644 28. Sorokin DY, Vejmekova D, Lücker S, Streshinskaya GM, Rijpstra WIC, Sinninghe  
645 Damsté JS, et al. *Nitrolancea hollandica* gen. nov., sp. nov., a chemolithoautotrophic  
646 nitrite-oxidizing bacterium isolated from a bioreactor belonging to the phylum  
647 *Chloroflexi*. *Int J Syst Evol Microbiol*. 2014;64:1859–1865.
- 648 29. Lebedeva E V., Alawi M, Jozsa PG, Daims H, Spieck E. Physiological and phylogenetic  
649 characterization of a novel lithoautotrophic nitrite-oxidizing bacterium, ‘*Candidatus*  
650 *Nitrospira bockiana*’. *Int J Syst Evol Microbiol*. 2008;58:242–250.
- 651 30. Lee KS, Palatinszky M, Pereira FC, Nguyen J, Fernandez VI, Mueller AJ, et al. An  
652 automated Raman-based platform for the sorting of live cells by functional properties. *Nat*  
653 *Microbiol*. 2019;4:1035–1048.
- 654 31. Kim JG, Park SJ, Sinninghe Damsté JS, Schouten S, Rijpstra WIC, Jung MY, et al.  
655 Hydrogen peroxide detoxification is a key mechanism for growth of ammonia-oxidizing  
656 archaea. *Proc Natl Acad Sci U S A*. 2016;113:7888–7893.
- 657 32. Miranda KM, Espey MG, Wink DA. A Rapid, Simple Spectrophotometric Method for  
658 Simultaneous Detection of Nitrate and Nitrite. *Nitric Oxide - Biol Chem*. 2001;5:62–71.
- 659 33. Vallenet D, Calteau A, Dubois M, Amours P, Bazin A, Beuvin M, et al. MicroScope: an

- 660 integrated platform for the annotation and exploration of microbial gene functions through  
661 genomic, pangenomic and metabolic comparative analysis. *Nucleic Acids Res.*  
662 2020;48:D579–D589.
- 663 34. Parks DH, Imelfort M, Skennerton CT, Hugenholtz P, Tyson GW. CheckM: Assessing the  
664 quality of microbial genomes recovered from isolates, single cells, and metagenomes.  
665 *Genome Res.* 2015;25:1043–1055.
- 666 35. Nguyen LT, Schmidt HA, Von Haeseler A, Minh BQ. IQ-TREE: A fast and effective  
667 stochastic algorithm for estimating maximum-likelihood phylogenies. *Mol Biol Evol.*  
668 2015;32:268–274.
- 669 36. Kalyaanamoorthy S, Minh BQ, Wong TKF, Von Haeseler A, Jermiin LS. ModelFinder:  
670 Fast model selection for accurate phylogenetic estimates. *Nat Methods.* 2017;14:587–589.
- 671 37. Hoang DT, Chernomor O, von Haeseler A, Minh BQ, Vinh LS. UFBoot2: Improving the  
672 Ultrafast Bootstrap Approximation. *Molecular biology and evolution.* *Mol Biol Evol.*  
673 2018;35:518–522.
- 674 38. Konstantinidis KT, Tiedje JM. Towards a genome-based taxonomy for prokaryotes. *J*  
675 *Bacteriol.* 2005;187:6258–6264.
- 676 39. Varghese NJ, Mukherjee S, Ivanova N, Konstantinidis T, Mavrommatis K, Kyrpides NC,  
677 et al. Microbial species delineation using whole genome sequences. *Nucleic Acids Res.*  
678 2015;43:6761–6771.
- 679 40. Daebeler A, Herbold CW, Vierheilig J, Sedlacek CJ, Pjevac P, Albertsen M, et al.  
680 Cultivation and genomic analysis of ‘*Candidatus Nitrosocaldus islandicus*,’ an obligately  
681 thermophilic, ammonia-oxidizing thaumarchaeon from a hot spring biofilm in Graendalur  
682 valley, Iceland. *Front Microbiol.* 2018;9:1–16.

- 683 41. R Core Team. R: A language and environment for statistical computing. 2019. R  
684 Foundation for Statistical Computing, Vienna, Austria.
- 685 42. Kits KD, Sedlacek CJ, Lebedeva E V., Han P, Bulaev A, Pjevac P, et al. Kinetic analysis  
686 of a complete nitrifier reveals an oligotrophic lifestyle. *Nature*. 2017;549:269–272.
- 687 43. Fujitani H, Kumagai A, Ushiki N, Momiuchi K. Selective isolation of ammonia-oxidizing  
688 bacteria from autotrophic nitrifying granules by applying cell-sorting and sub-culturing of  
689 microcolonies. *Front Microbiol*. 2015;6:1159.
- 690 44. Uchiyama T, Watanabe K. Substrate-induced gene expression (SIGEX) screening of  
691 metagenome libraries. *Nat Protoc*. 2008;3:1202–1212.
- 692 45. Ostafe R, Prodanovic R, Commandeur U, Fischer R. Flow cytometry-based ultra-high-  
693 throughput screening assay for cellulase activity. *Anal Biochem*. 2013;435:93–98.
- 694 46. Pereira H, Barreira L, Mozes A, Florindo C, Polo C, Duarte C V., et al. Microplate-based  
695 high throughput screening procedure for the isolation of lipid-rich marine microalgae.  
696 *Biotechnol Biofuels*. 2011;4:61.
- 697 47. Ruger H-J, Hofle MG. Marine Star-Shaped-Aggregate-Forming Bacteria: *Agrobacterium*  
698 *atlanticum* sp. nov.; *Agrobacterium meteori* sp. nov.; *Agrobacterium ferrugineum* sp.  
699 nov., nom. rev.; *Agrobacterium gelatinovorum* sp. nov., nom. rev.; and *Agrobacterium*  
700 *stellulatum* sp. nov., nom. . *Int J Syst Bacteriol*. 1992;42:133–143.
- 701 48. Lee K, Choo Y, Giovannoni SJ, Cho J. *Maritimibacter alkaliphilus* gen. nov., sp. nov., a  
702 genome-sequenced marine bacterium of the Roseobacter clade in the order  
703 *Rhodobacterales*. *Int J Syst Evol Microbiol*. 2007;57:1653–1658.
- 704 49. Morris JJ, Johnson ZI, Szul MJ, Keller M, Zinser ER. Dependence of the cyanobacterium  
705 *Prochlorococcus* on hydrogen peroxide scavenging microbes for growth at the ocean’s

- 706 surface. PLoS One. 2011;6.
- 707 50. Bayer B, Pelikan C, Bittner MJ, Reinthaler T, Herndl GJ, Offre P. Proteomic Response of  
708 Three Marine Ammonia-Oxidizing Archaea to Hydrogen Peroxide and Their Metabolic  
709 Interactions with a Heterotrophic Alphaproteobacterium. mSystems. 2019;4:1–15.
- 710 51. Bayer B, Hansman RL, Bittner MJ, Noriega-ortega BE, Niggemann J, Dittmar T, et al.  
711 Ammonia-oxidizing archaea release a suite of organic compounds potentially fueling  
712 prokaryotic heterotrophy in the ocean. Environ Microbiol. 2019;21:4062–4075.
- 713 52. Rodriguez-r LM, Konstantinidis KT, Sequence-discrete MF. Bypassing Cultivation To  
714 Identify Bacterial Species. Microbe. 2014;9:111–118.
- 715 53. Watson SW, Bock E, Valois FW, Waterbury JB, Schlosser U. *Nitrospira marina* gen. nov.  
716 sp. nov.: a chemolithotrophic nitrite-oxidizing bacterium. Arch Microbiol. 1986;144: 1–7.
- 717 54. Nowka B, Daims H, Spieck E. Comparison of oxidation kinetics of nitrite-oxidizing  
718 bacteria: Nitrite availability as a key factor in niche differentiation. Appl Environ  
719 Microbiol. 2015;81:745–753.
- 720 55. Jacob J, Nowka B, Merten V, Sanders T, Spieck E, Dähnke K. Oxidation kinetics and  
721 inverse isotope effect of marine nitrite-oxidizing isolates. Aquat Microb Ecol.  
722 2017;80:289–300.
- 723 56. Ushiki N, Jinno M, Fujitani H, Suenaga T, Terada A, Tsuneda S. Nitrite oxidation kinetics  
724 of two *Nitrospira* strains: The quest for competition and ecological niche differentiation. J  
725 Biosci Bioeng. 2017;123:581–589.
- 726 57. Sun X, Ji Q, Jayakumar A, Ward BB. Dependence of nitrite oxidation on nitrite and  
727 oxygen in low-oxygen seawater. Geophys Res Lett. 2017;44:7883–7891.
- 728 58. Jones R, Morita R. Low-temperature growth and whole-cell kinetics of a marine



- 729 ammonium oxidizer. *Mar Ecol Prog Ser.* 1985;21:239–243.
- 730 59. Kovárová-Kovar K, Egli T. Growth kinetics of suspended microbial cells: from single-  
731 substrate-controlled growth to mixed-substrate kinetics. *Microbiol Mol Biol Rev.*  
732 1998;62:646–66.
- 733 60. Martens-Habbena W, Stahl DA. Nitrogen metabolism and kinetics of ammonia-oxidizing  
734 archaea. In: Koltz MG, Stein LY (eds). *Research on Nitrification and Related Processes,*  
735 *Part B.* 1st edn. (Academic Press, 2011) pp. 466-487.
- 736 61. Serata M, Iino T, Yasuda E, Sako T. Roles of thioredoxin and thioredoxin reductase in the  
737 resistance to oxidative stress in *Lactobacillus casei*. *Microbiology.* 2012;158:953–962.
- 738 62. Song JJ, Rhee JG, Suntharalingam M, Walsh SA, Spitz DR, Lee YJ. Role of glutaredoxin  
739 in metabolic oxidative stress: Glutaredoxin as a sensor of oxidative stress mediated by  
740 H<sub>2</sub>O<sub>2</sub>. *J Biol Chem.* 2002;277:46566–46575.
- 741 63. Lückner S, Wagner M, Maixner F, Pelletier E, Koch H, Vacherie B, et al. A *Nitrospira*  
742 metagenome illuminates the physiology and evolution of globally important nitrite-  
743 oxidizing bacteria. *Proc Natl Acad Sci U S A.* 2010;107:13479–13484.
- 744 64. Bock E, Wagner M. Oxidation of Inorganic Nitrogen Compounds as an Energy Source.  
745 In: Dworkin M, Falkow S, Rosenberg E, Schleifer K-H, Stackebrandt E (eds). *The*  
746 *Prokaryotes: Volume 2: Ecophysiology and Biochemistry.* 3rd edn. (Springer New York,  
747 New York, 2006) pp 457–495.
- 748 65. Pereira MM, Santana M, Teixeira M. A novel scenario for the evolution of haem-copper  
749 oxygen reductases. *Biochim Biophys Acta. Bioenerg.* 2001;1505:185–208.
- 750 66. Munding AB, Lawson CE, Jetten MSM, Koch H, Lückner S. Cultivation and  
751 Transcriptional Analysis of a Canonical *Nitrospira* Under Stable Growth Conditions.

- 752 Front Microbiol. 2019;10:1325.
- 753 67. Borisov VB, Forte E, Davletshin A, Mastronicola D, Sarti P, Giuffrè A. Cytochrome bd  
754 oxidase from *Escherichia coli* displays high catalase activity: An additional defense  
755 against oxidative stress. FEBS Lett. 2013;587:2214–2218.
- 756 68. Das A, Silaghi-Dumitrescu R, Ljungdahl LG, Kurtz DM. Oxidase, Oxidative Stress, and  
757 Dioxygen Tolerance of the Strictly Anaerobic Bacterium. J Bacteriol. 2005;187:2020–  
758 2029.
- 759 69. Steinmüller W, Bock E. Growth of Nitrobacter in the Presence of Organic Matter. Arch  
760 Microbiol. 1976;108:299–304.
- 761 70. Banciu H, Sorokin DY. Adaptation in Haloalkaliphiles and Natronophilic Bacteria. In:  
762 Seckbach J, Oren A, Stan-Lotter H (eds). Polyextremophiles. (Springer, Dordrecht, 2013)  
763 pp 249-267.
- 764 71. Sáenz JP, Grosser D, Bradley AS, Lagny TJ, Lavrynenko O, Broda M, et al. Hopanoids as  
765 functional analogues of cholesterol in bacterial membranes. Proc Natl Acad Sci U S A.  
766 2015;112:11971–11976.
- 767 72. Belin BJ, Busset N, Giraud E, Molinaro A, Silipo A, Newman DiK. Hopanoid lipids:  
768 From membranes to plant-bacteria interactions. Nat Rev Microbiol. 2018;16:304–315.
- 769 73. Kharbush JJ, Thompson LR, Haroon MF, Knight R, Aluwihare LI. Hopanoid-producing  
770 bacteria in the Red Sea include the major marine nitrite oxidizers. FEMS Microbiol Ecol.  
771 2018;94:1–9.
- 772 74. Tian R-M, Sun J, Cai L, Zhang W-P, Zhou G-W, Qiu J-W, et al. The deep-sea glass  
773 sponge *Lophophysema eversa* harbours potential symbionts responsible for the nutrient  
774 conversions of carbon , nitrogen and sulfur. Environ Microbiol. 2016;18:2481–2494.

- 775 75. Klein JS, Lewinson O. Bacterial ATP-driven transporters of transition metals:  
776 Physiological roles, mechanisms of action, and roles in bacterial virulence. *Metallomics*.  
777 2011;3:1098–1108.
- 778 76. Fang H, Kang J, Zhang D. Microbial production of vitamin B12: A review and future  
779 perspectives. *Microb Cell Fact*. 2017;16:1–14.
- 780 77. Doxey AC, Kurtz DA, Lynch MDJ, Sauder LA, Neufeld JD. Aquatic metagenomes  
781 implicate *Thaumarchaeota* in global cobalamin production. *ISME J*. 2015; 9: 461–471.
- 782 78. Heal KR, Qin W, Ribalet F, Bertagnolli AD, Coyote-maestas W, Hmelo LR. Two distinct  
783 pools of B12 analogs reveal community interdependencies in the ocean. *Proc Natl Acad*  
784 *Sci USA*. 2016;114:364–369.
- 785 79. Heal KR, Qin W, Amin SA, Devol AH, Moffett JW, Armbrust EV, et al. Accumulation of  
786 NO<sub>2</sub>-cobalamin in nutrient-stressed ammonia-oxidizing archaea and in the oxygen de fi  
787 cient zone of the eastern tropical North Pacific. *Environ Microbiol Rep*. 2018;10:453–457.
- 788 80. Park BJ, Park SJ, Yoon DN, Schouten S, Damsté JSS, Rhee SK. Cultivation of  
789 autotrophic ammonia-oxidizing archaea from marine sediments in coculture with sulfur-  
790 oxidizing bacteria. *Appl Environ Microbiol*. 2010;76: 7575–7587.
- 791 81. Kitzinger K, Koch H, Lückner S, Sedlacek CJ, Herbold C, Schwarz J, et al.  
792 Characterization of the first “*Candidatus Nitrotoga*” isolate reveals metabolic versatility  
793 and separate evolution of widespread nitrite-oxidizing bacteria. *MBio*. 2018;9:1–16.  
794  
795

796 **Figure legends**

797 **Figure 1.** Concatenated marker gene tree of the Nitrospinae. The maximum likelihood tree  
798 shows the phylogenetic positions of the two newly cultured strains (highlighted in red) within the  
799 phylum Nitrospinae. The tree was calculated from a concatenated alignment of 120 conserved  
800 bacterial marker proteins. Details of the Nitrospinae genomes, which were used to calculate this  
801 tree, are listed in Table S1. Numbers at branches indicate ultrafast bootstrap (n=1,000) support.  
802 *Nitrospira moscoviensis*, *Desulfococcus multivorans*, and *Geobacter metallireducens* were used  
803 as an outgroup. Cultured organisms are marked with an asterisk. Clades of the Nitrospinae are  
804 indicated as proposed elsewhere [6] and the family Nitrospinaeaceae is indicated as determined by  
805 GTDB-TK. The scale bar indicates 0.1 estimated substitutions per residue. The sample source is  
806 indicated in parentheses.

807

808 **Figure 2.** Average amino acid identity (AAI) analysis of the Nitrospinae. Pairwise AAI values  
809 were calculated for the same set of Nitrospinae genomes that was used to reconstruct the  
810 phylogenetic tree in Fig. 1. The same tree is used here to annotate the heatmap. The two newly  
811 cultured strains are highlighted in red. Clades of the Nitrospinae are indicated as proposed  
812 elsewhere [6]. The boxes indicate the genus boundary at 60% identity.

813

814 **Figure 3.** Scanning electron microscopy (SEM) and CARD-FISH images of the two newly  
815 cultured Nitrospinae strains and *N. gracilis*. **a, d, g** “*Ca. Nitroheli*x vancouverensis” strain VA.  
816 **b, e, h** “*Ca. Nitronauta litoralis*” strain EB. **c, f, i** *N. gracilis*. The short rod in **d** is a cell of the  
817 accompanying heterotroph *Stappia* sp. in the enrichment. **e** Shows slightly longer and slightly  
818 curved rods (strain EB, arrows) and shorter rods, which are cells of the accompanying

819 heterotroph *M. alkaliphilus* in the enrichment. The scale bars in **a-c** depict 1  $\mu\text{m}$ ; all other scale  
820 bars depict 2  $\mu\text{m}$ . **g-i** The 16S rRNA-targeted probe Ntspn759 was used to detect Nitrospinae  
821 cells (magenta), and total nucleic acids were stained with SYBR Green (cyan).

822

823 **Figure 4.** Comparison of the whole-cell apparent half-saturation constants ( $K_{m(\text{app})}$ ) for nitrite  
824 between marine and non-marine NOB. The  $K_{m(\text{app})}$  values measured in this study (highlighted in  
825 red) are the mean from all biological replicates (n=3 for “*Ca. Nitrohelix vancouverensis*” VA;  
826 n=5 for “*Ca. Nitronauta litoralis*” EB; n=8 for *N. gracilis*). The other  $K_{m(\text{app})}$  values were  
827 retrieved from previous studies [54, 55, 81].

828

829 **Figure 5.** Cell cartoon based on the annotation of “*Ca. Nitrohelix vancouverensis*” VA, “*Ca.*  
830 *Nitronauta litoralis*” EB and *N. gracilis* 3/211. The colored squares indicate the presence or  
831 absence of the respective genes, “*Ca. Nitrohelix vancouverensis*” VA is shown in green, “*Ca.*  
832 *Nitronauta litoralis*” EB in blue, and *N. gracilis* 3/211 in purple. The gene annotations are  
833 detailed in Table S3. Abbreviations: Fd, ferredoxin; RE, restriction enzymes; TO, terminal  
834 oxidase.

835

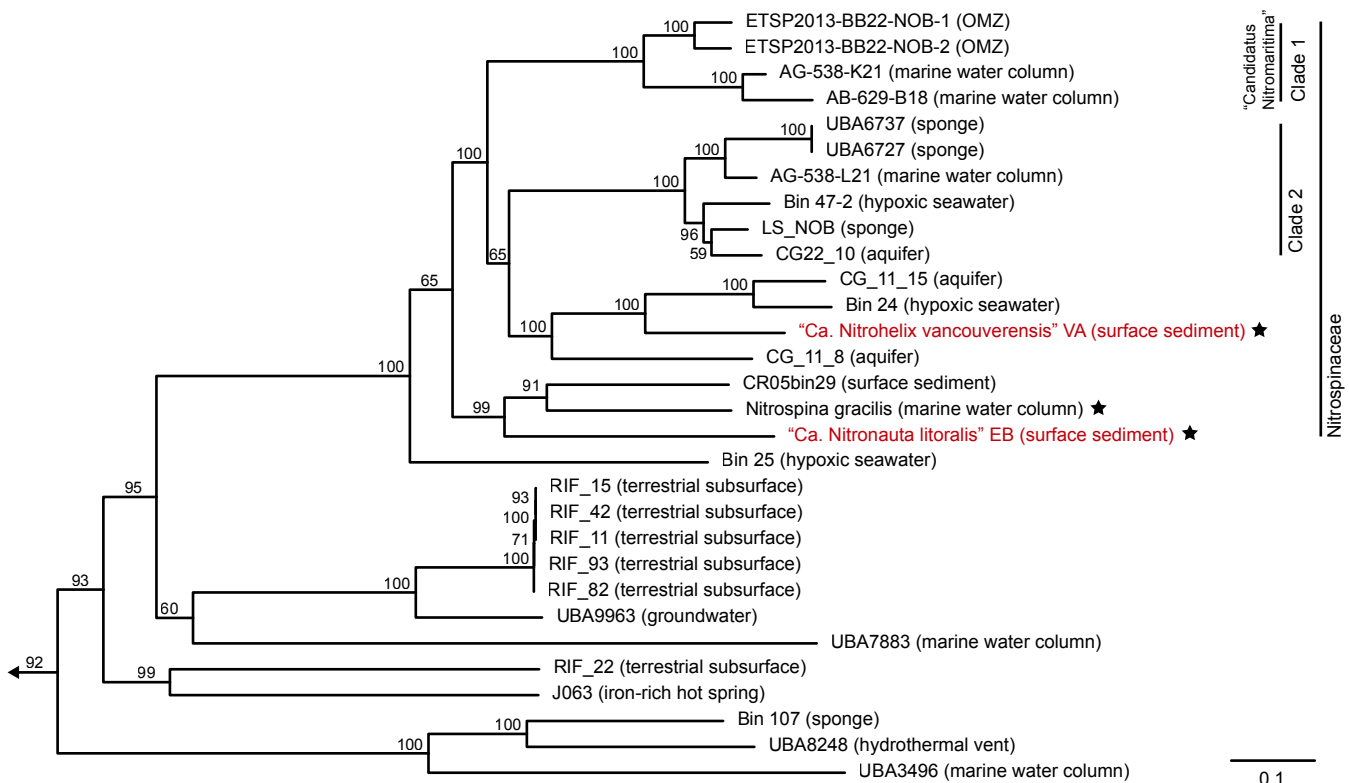

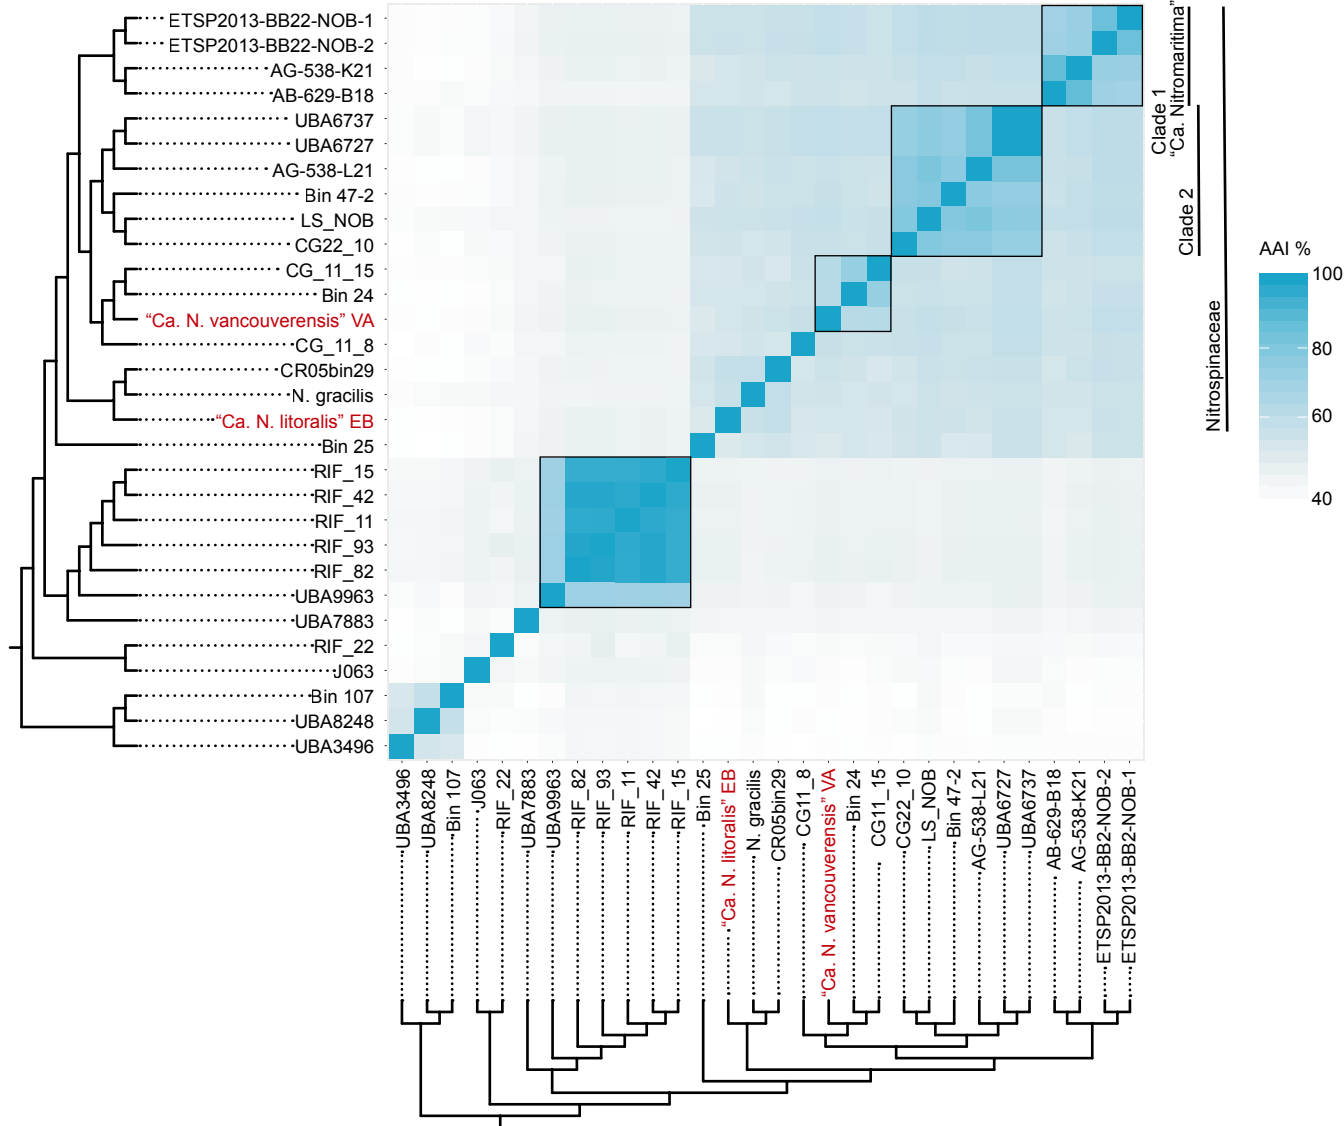

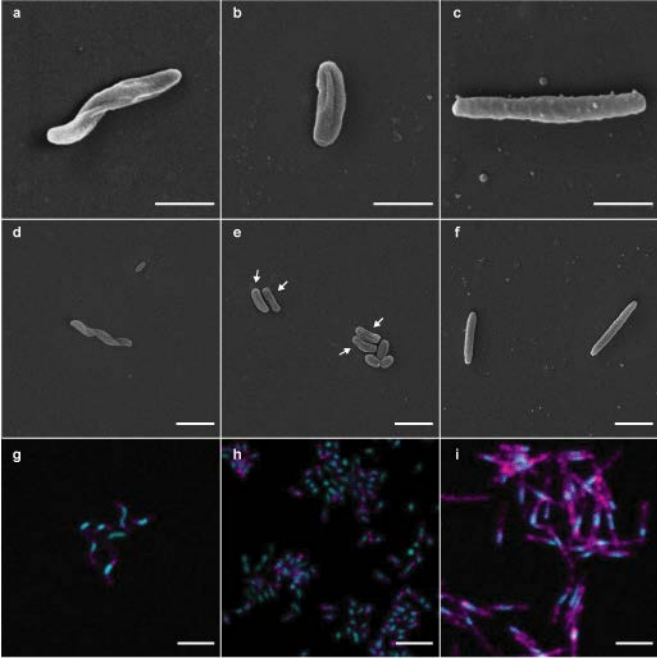



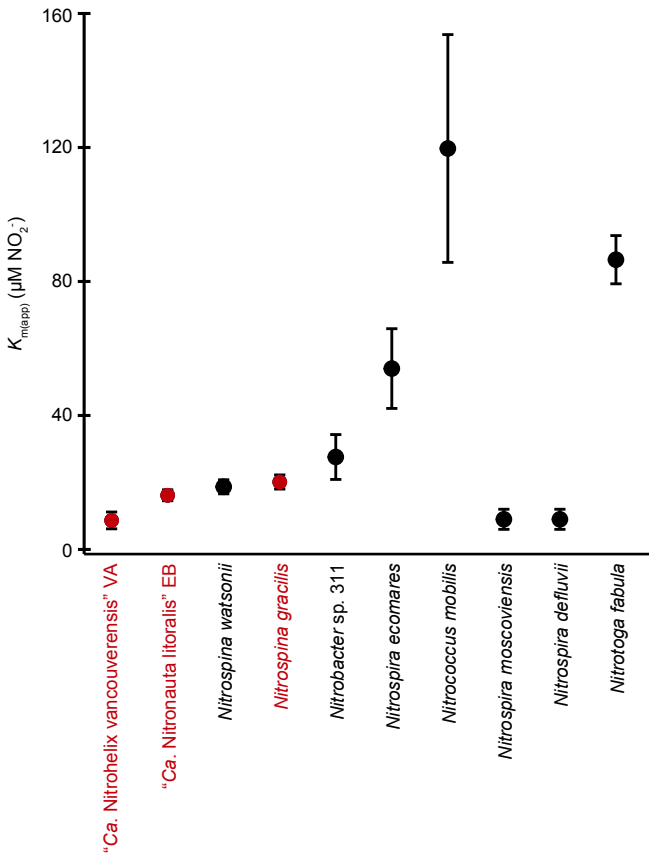

■ "Ca. Nitrohelix vancouverensis" VA  
■ "Ca. Nitronauta litoralis" EB  
■ Nitrospina gracilis

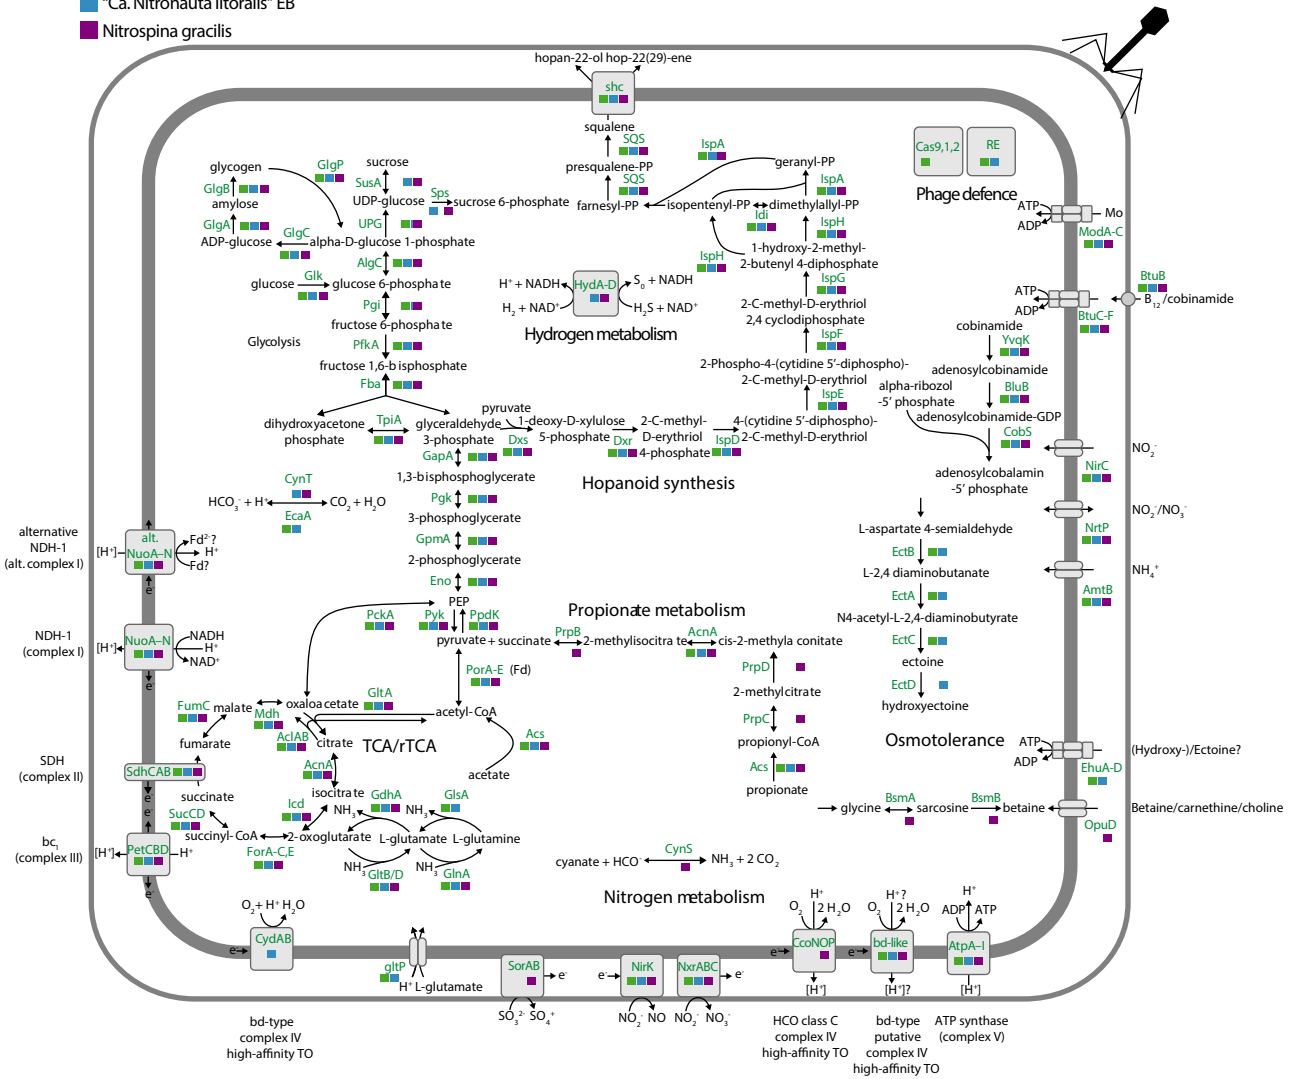

Source: https://www.biorxiv.org/content/10.1101/2020.06.09.141952v2.full.pdf
